# Supplementary material for: Bridging sequence diversity and tissue-specific expression by DNA methylation in genes of the mouse prolactin superfamily
Source: Springer Nature journal article supplement (doi:10.1007/s00335-011-9383-x), 2011-12-22
Supplement: MOESM2 [file 335_2011_9383_MOESM2_ESM.doc]

**SUPPLEMENTARY LEGENDS**

**Supplementary Fig. 1 LINE-rich/SINE-poor proportions in mouse *PRL* superfamily gene cluster**

Repeat markers were visualized by USCS genome browser (mm8).

**Supplementary Fig. 2 DNA methylation status of *PRL* superfamily members in placenta, liver and cerebrum.**

(A) DNA methylation status of *PRL* members categorized into cluster A. The upper panels show the Integrated Genome Browser (IGB) of comparative D-REAM signals. Arrowheads and vertical lines represent T-DMR and HpyCH4IV sites, respectively. Comparative signals between tissues are indicated as bars. Pla, placenta; Lv, liver; Ce, cerebrum. The central panel shows electrophoresis patterns for COBRA using HpyCH4IV. Where the HpyCH4IV sites are methylated, PCR products are fragmented (filled arrowhead), and where PCR products are not fragmented (open arrowhead), the HpyCH4IV sites are unmethylated. The level of methylation, estimated by the intensity of each band, is indicated below the gels. Undigested (U), digested (C), and 100-bp DNA ladder (M) are indicated. The lower panels show the DNA methylation status of the CpGs within the 2-kb flanking the transcription start sites in *PRL* superfamily genes in the placenta, liver, and cerebrum, investigated by bisulfite sequencing. The vertical lines and numbers indicate the position of cytosine residues of CpGs relative to the transcription start site (+1). CpGs are represented as open dots (unmethylated) or filled dots (methylated). The open square around the CpGs indicates T-DMR. *Sequencing only*, DNA methylation status of the genes which have no HpyCH4IV sites were analyzed by bisulfite sequencing. (B) DNA methylation status of *PRL* members categorized into cluster B. (C) DNA methylation status of *PRL* members categorized into cluster C. (D) DNA methylation status of *PRL* members categorized into cluster D.

**Supplementary Fig. 3 Correlation between the DNA methylation profile of *PRL* superfamily members and cDNA sequences.**

Comparisons of the 24 paralogous mouse *PRL* superfamily cDNAs and phylogenetic tree construction were performed using CLUSTAL W software program.
